# Supplementary material
Source: PubMed Central journal article supplement (PMC4961034)
Supplement: NIHMS789377-supplement-supplement_1.pdf [file NIHMS789377-supplement-supplement_1.pdf]

Supplemental Information

**Table S1.** Experimental design for Experiments 1-3.

|                     | Experimental day |                |   |   |       |                    |                        |            |               |            |               |            |
|---------------------|------------------|----------------|---|---|-------|--------------------|------------------------|------------|---------------|------------|---------------|------------|
|                     | 0                | 1              | 2 | 3 | 4     | 5                  | 6                      | 7          | 8             | 9          | 10            | 11         |
| <b>Experiment 1</b> | Pre-test         | Pellet implant |   |   | Train | Post-training test | Confinement 1          | Ext test 1 | Confinement 2 | Ext test 2 | Confinement 3 | Ext test 3 |
| <b>Experiment 2</b> | Pre-test         | Pellet implant |   |   | Train | 1d test            |                        |            |               |            |               | 7 d test   |
| <b>Experiment 3</b> | Pre-test         | Pellet implant |   |   | Train | Post-training test | Confinement 1          | Ext test 1 |               |            |               |            |
|                     |                  |                |   |   |       |                    | ↑<br>DCS<br>or vehicle |            |               |            |               |            |

DCS, D-cycloserine; Ext, extinction; d, day.
